# Supplementary material for: Rapid detection of cancer DNA in human blood using cysteamine-capped AuNPs and a machine learning-enabled smartphone
Source: Royal Society of Chemistry journal article supplement (doi:10.1039/d2ra05725e), 2023-01-01
Supplement: d2ra05725e1.pdf [file d2ra05725e1.pdf]

## Electronic Supplementary Information (ESI)

### Rapid detection of cancer DNA in human blood using cysteamine-capped AuNPs and a machine learning-enabled smartphone

Sireemas Koowattanasuchat<sup>a</sup>, Sawinee Ngernpimai<sup>a</sup>, Piyaporn Matulakul<sup>a</sup>,  
Janpen Thonghlueng<sup>a</sup>, Witthawat Phanchai<sup>a</sup>, Apiwat Chompoosor<sup>b</sup>,  
Uthumporn Panitanarak<sup>c</sup>, Yupaporn Wanna<sup>d</sup>, Thanapong Intharah<sup>d</sup>,  
Kanokon Chootawiriyasakul<sup>e</sup>, Pimjai Anata<sup>f</sup>, Prajuab Chaimnee<sup>f</sup>,  
Raynoo Thanan<sup>g</sup>, Chadamas Sakonsinsiri<sup>g</sup>, Theerapong Puangmali<sup>a,\*</sup>

<sup>a</sup>*Department of Physics, Faculty of Science, Khon Kaen University,  
Khon Kaen 40002, Thailand*

<sup>b</sup>*Department of Chemistry, Faculty of Science, Ramkhamhaeng University,  
Bangkok 10240, Thailand*

<sup>c</sup>*Department of Biostatistics, Faculty of Public Health,  
Mahidol University, Bangkok 10400, Thailand*

<sup>d</sup>*Department of Statistics, Faculty of Science, Khon Kaen University,  
Khon Kaen 40002, Thailand*

<sup>e</sup>*Department of Medicine, Faculty of Medicine,  
Khon Kaen University, Khon Kaen 4002, Thailand*

<sup>f</sup>*Molecular Diagnosis Unit, Central Laboratory, Srinagarind Hospital,  
Khon Kaen University, Khon Kaen 4002, Thailand*

<sup>g</sup>*Department of Biochemistry, Faculty of Medicine, Khon Kaen University,  
Khon Kaen 40002, Thailand*

<sup>\*</sup>*Corresponding author: E-mail: theerapong@kku.ac.th*

## I. DATA ANALYSIS

A confusion matrix (Fig. 5(c)), also known as an error matrix in machine learning (ML), is a specific table structure that permits visualization of the performance of an algorithm, typically one that uses supervised learning. Each row of the matrix represents an actual class, whereas each column represents a forecast class. In the present work, cancer patients and normal cases are considered as positive and negative labels, respectively. The following definitions apply to terminology and derivations from a confusion matrix.

|                                            |                                                                                              |
|--------------------------------------------|----------------------------------------------------------------------------------------------|
| <b>Condition positive (<math>P</math>)</b> | represents the number of true positive cases in the data set.                                |
| <b>Condition negative (<math>N</math>)</b> | is the number of real negative cases in the data.                                            |
| <b>True positive (<math>TP</math>)</b>     | is a test result that correctly indicates the presence of a condition or characteristic.     |
| <b>True negative (<math>TN</math>)</b>     | is a test result that correctly indicates the absence of a condition or characteristic.      |
| <b>False positive (<math>FP</math>)</b>    | is a test result which wrongly indicates that a particular condition is present.             |
| <b>False negative (<math>FN</math>)</b>    | is a test result which wrongly indicates that a particular condition or attribute is absent. |

### Sensitivity

Sensitivity is defined as the fraction of true positive labels ( $TP$ ) relative to the summation of true positive and false negative labels ( $TP + FN$ ).

$$\text{Sensitivity} = \frac{TP}{TP + FN} \quad (1)$$

### Specificity

Specificity is defined as the fraction of true negative labels ( $TN$ ) relative to the summation of true negative and false positive labels ( $TN + FP$ ).

$$\text{Specificity} = \frac{TN}{TN + FP} \quad (2)$$

**Positive predictive value ( $PPV$ )**

Positive predictive value is defined as the fraction of the number of true positives ( $TP$ ) to the number of all positive calls ( $TP + FP$ ).

$$PPV = \frac{TP}{TP + FP} \quad (3)$$

**Negative predictive value ( $NPV$ )**

Negative predictive value is defined as the fraction of the number of true negatives ( $TN$ ) to the number of all negative calls ( $TN + FN$ ).

$$NPV = \frac{TN}{TN + FN} \quad (4)$$

**Accuracy**

Accuracy is the proportion of accurately predicted labels among all predictions.

$$\text{Accuracy} = \frac{TP + TN}{TP + TN + FP + FN} \quad (5)$$

Fig. 5(c) is a summary of the results predicted by the machine learning analysis ( $TP = 31$ ,  $TN = 10$ ,  $FP = 2$ , and  $FN = 0$ ). Calculating sensitivity, specificity,  $PPV$ ,  $NPV$ , and accuracy is as follows:

$$\text{Sensitivity} = \frac{TP}{TP + FN} = \frac{31}{31 + 0} = 1.000 \quad (6)$$

$$\text{Specificity} = \frac{TN}{TN + FP} = \frac{10}{10 + 2} = 0.8383 \quad (7)$$

$$PPV = \frac{TP}{TP + FP} = \frac{31}{31 + 2} = 0.9394 \quad (8)$$

$$NPV = \frac{TN}{TN + FN} = \frac{10}{10 + 0} = 1.000 \quad (9)$$

$$\text{Accuracy} = \frac{TP + TN}{TP + TN + FP + FN} = \frac{31 + 10}{31 + 10 + 2 + 0} = 0.9534 \quad (10)$$

Therefore, the sensitivity, specificity,  $PPV$ ,  $NPV$ , and accuracy are 100.0%, 83.3%, 93.9%, 100.0%, and 95.3%, respectively.

## II. ADDITIONAL EXPERIMENTAL METHOD AND RESULTS

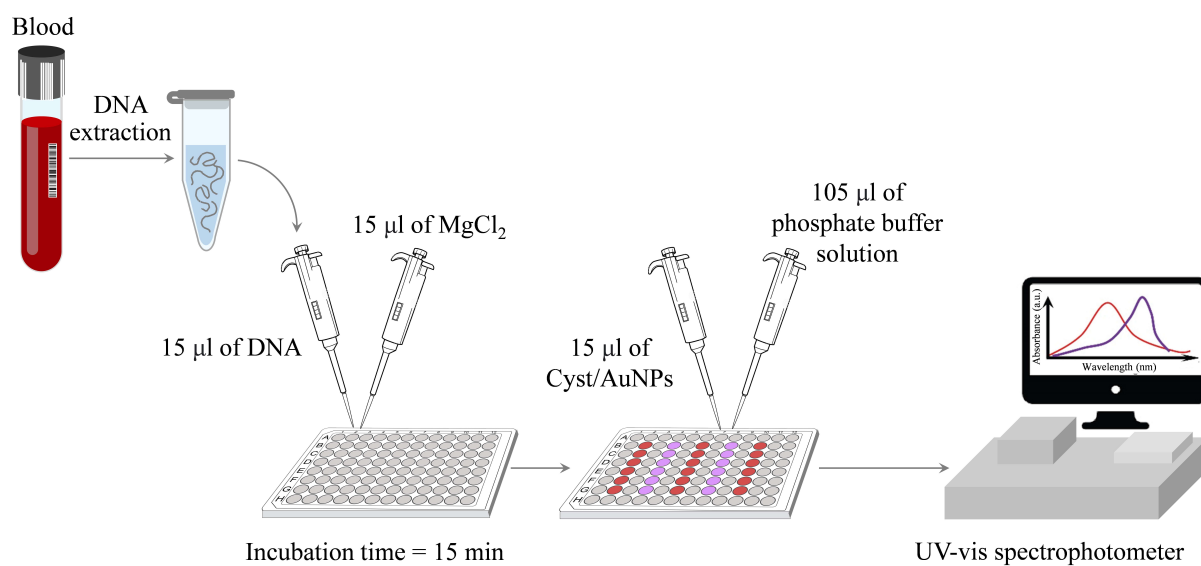

Fig. S1: Schematic illustration of the procedure for Methylscape detection.

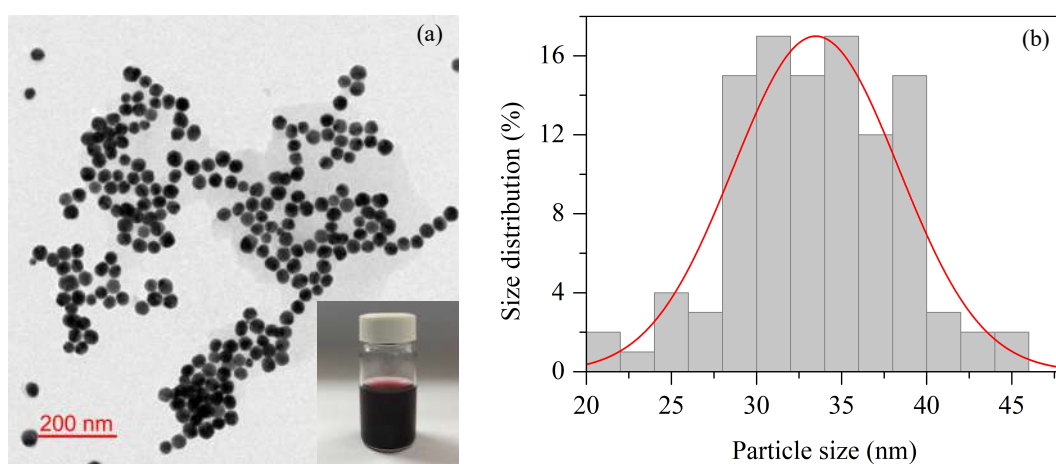

Fig. S2: (a) Transmission electron microscopy image of cysteamine-capped gold nanoparticles (Cyst/AuNPs). (b) Size distribution of Cyst/AuNPs.

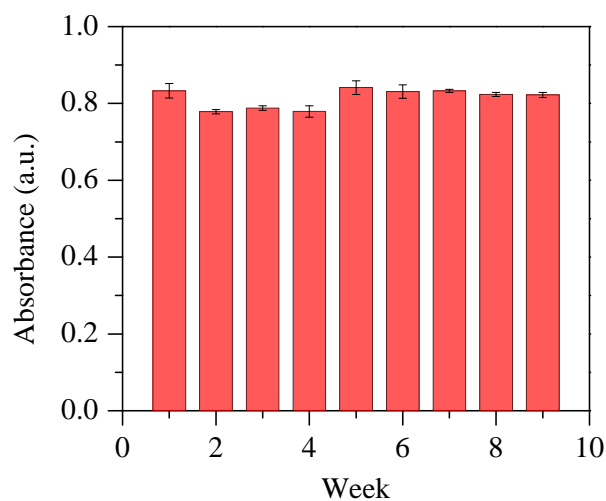

Fig. S3: Stability of cysteamine-decorated gold nanoparticles (Cyst/AuNPs). The absorbance (at 525 nm) of the nanoparticle solution had been measured every week for nine weeks. The solution was stored at a temperature of 4 C°.

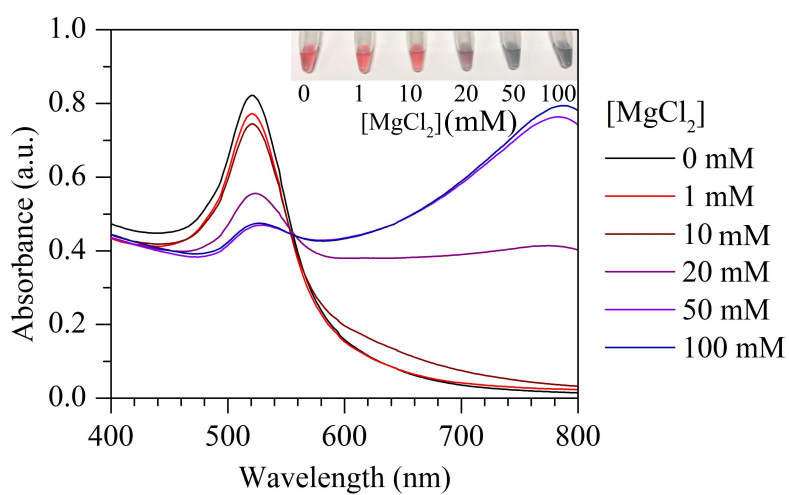

Fig. S4: The absorbance of AuNPs solution in the presence of MgCl<sub>2</sub> with different concentrations.

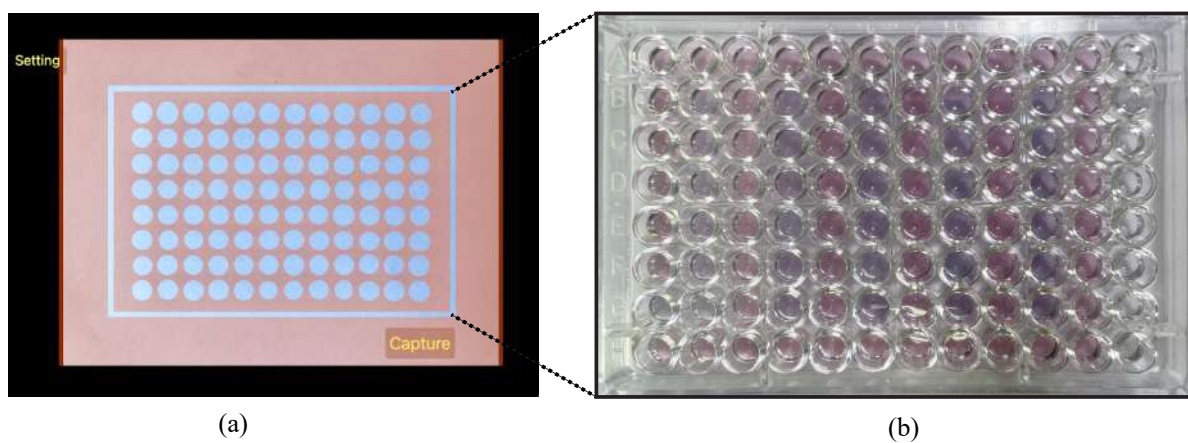

Fig. S5: (a) The screen of the mobile phone application used for taking photograph. (b) An example of the image taken with our developed application for the colorimetric cancer screening.

Table S1: Clinical information of representative DNA samples extracted from the blood.

| Sample | Gender | Age (Year) | Absorbance( $\Delta A_{650/525}$ ) | Type     | Diagnostic |
|--------|--------|------------|------------------------------------|----------|------------|
| C1     | Male   | 44         | 0.599                              | Leukemia | Cancer     |
| C2     | Female | 54         | 0.452                              | Leukemia | Cancer     |
| C3     | Female | 63         | 0.387                              | Leukemia | Cancer     |
| C4     | Female | 24         | 0.655                              | Leukemia | Cancer     |
| C5     | Male   | 60         | 0.703                              | Leukemia | Cancer     |
| C6     | Female | 59         | 0.600                              | Leukemia | Cancer     |
| C7     | Female | 54         | 0.398                              | Leukemia | Cancer     |
| C8     | Female | 74         | 0.421                              | Leukemia | Cancer     |
| C9     | Female | 61         | 0.845                              | Leukemia | Cancer     |
| C10    | Male   | 61         | 0.705                              | Leukemia | Cancer     |
| C11    | Female | 79         | 0.532                              | Leukemia | Cancer     |
| C12    | Female | 37         | 0.700                              | Leukemia | Cancer     |
| C13    | Male   | 66         | 0.155                              | Leukemia | Cancer     |
| C14    | Female | 52         | 0.226                              | Leukemia | Cancer     |
| C15    | Female | 63         | 0.373                              | Leukemia | Cancer     |
| C16    | Male   | 77         | 0.554                              | Leukemia | Cancer     |
| C17    | Male   | 52         | 0.601                              | Leukemia | Cancer     |
| C18    | Male   | 29         | 0.503                              | Leukemia | Cancer     |
| C19    | Male   | 35         | 0.468                              | Leukemia | Cancer     |
| C20    | Male   | 41         | 0.380                              | Leukemia | Cancer     |
| C21    | Male   | 18         | 0.604                              | Leukemia | Cancer     |
| C22    | Female | 48         | 0.385                              | Leukemia | Cancer     |
| C23    | Female | 71         | 0.525                              | Leukemia | Cancer     |
| C24    | Male   | 51         | 0.661                              | Leukemia | Cancer     |
| C25    | Male   | 53         | 0.307                              | Leukemia | Cancer     |
| C26    | Male   | 45         | 0.149                              | Leukemia | Cancer     |
| C27    | Male   | 60         | 0.277                              | Leukemia | Cancer     |
| C28    | Male   | 65         | 0.157                              | Leukemia | Cancer     |
| C29    | Female | 27         | 0.407                              | Leukemia | Cancer     |
| C30    | Female | 59         | 0.613                              | Leukemia | Cancer     |
| C31    | Male   | 74         | 0.666                              | Leukemia | Cancer     |
| N1     | N/A    | N/A        | 0.960                              | Normal   | Normal     |
| N2     | N/A    | N/A        | 0.891                              | Normal   | Normal     |
| N3     | N/A    | N/A        | 0.996                              | Normal   | Normal     |
| N4     | Male   | 26         | 0.789                              | Normal   | Normal     |
| N5     | Male   | 25         | 0.785                              | Normal   | Normal     |
| N6     | Male   | 22         | 0.894                              | Normal   | Normal     |
| N7     | Male   | 32         | 0.737                              | Normal   | Normal     |
| N8     | Male   | 22         | 0.792                              | Normal   | Normal     |
| N9     | Female | 22         | 0.869                              | Normal   | Normal     |
| N10    | Male   | 25         | 0.924                              | Normal   | Normal     |
| N11    | Male   | 26         | 0.973                              | Normal   | Normal     |
| N12    | Female | 28         | 0.838                              | Normal   | Normal     |
